# Supplementary material for: Development of versatile non-homologous end joining-based knock-in module for genome editing
Source: PubMed Central journal article supplement (PMC5766535; doi:10.1038/s41598-017-18911-9), 2018-01-12

Supplementary Dataset for

**Development of versatile non-homologous end joining-based knock-in module for genome editing**

Shun Sawatsubashi<sup>1\*</sup>, Yudai Joko<sup>1</sup>, Seiji Fukumoto<sup>1</sup>, Toshio Matsumoto<sup>1</sup>, Shigeo S. Sugano<sup>2,3\*</sup>

<sup>1</sup> Department of Molecular Endocrinology, Fujii Memorial Institute of Medical Sciences, Institute of Advanced Medical Sciences, Tokushima University, Tokushima, Japan

<sup>2</sup> Ritsumeikan Global Innovation Research Organization, Ritsumeikan University, Shiga, Japan

<sup>3</sup> PRESTO, Japan Science and Technology Agency, Japan

\* Corresponding authors

This PDF files includes :

Supplementary Figs. S1 to S5

Supplementary Tables S1 to S5

Supplementary Information (including the uncropped gel and blot source data)

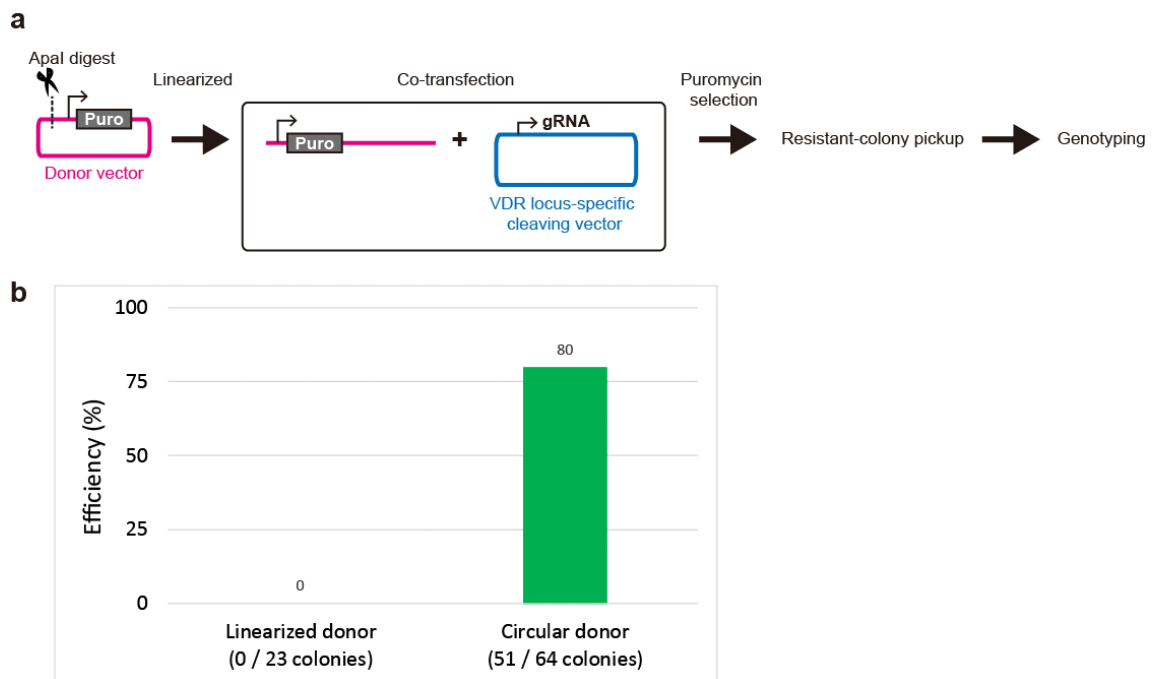

**Supplementary Fig. S1 Knock-in efficiency using a pre-linearized donor vector.**

(a) Schematic representation of knock-in strategy mediated a pre-linearized donor vector. The *PURO*-cassette vector was digested with *ApaI* enzyme. (b) The efficiency of knock-in events using linearized or circular donor vector with the condition optimized in Fig. 2.



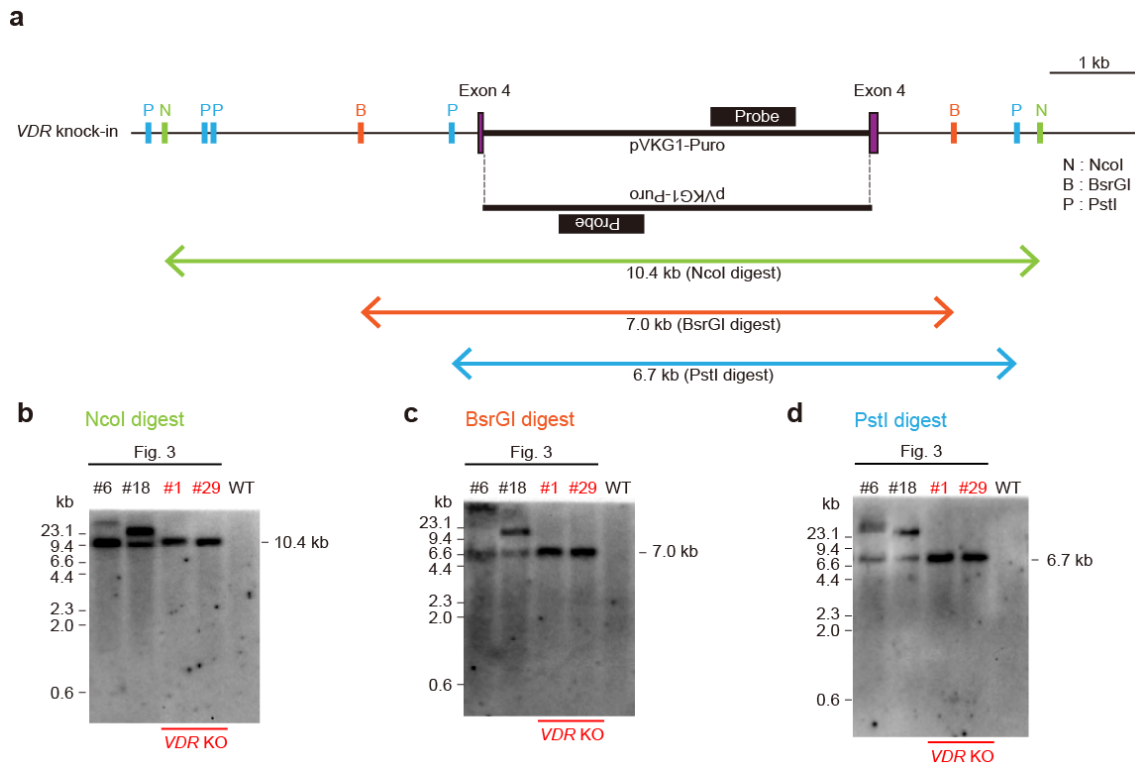

**Supplementary Fig. S3 Southern blot analyses of the genomes of clones which are described in Fig. 3a.**

(a) Schematic image of the experimental design of southern blotting. The specific probe for a donor vector pVKG1-Puro was shown as “Probe.” Expected sizes of the genome fragment digested by three restriction enzymes were shown. (b-d) Southern blot analysis of the genome of knock-in clones digested by NcoI (b), BsrGI (c), and PstI (d). #6, #18 were clones categorized as “random integrations” (Amplicon 6 positive). #1 and #29, which were red-colored, were clones categorized as “no random integrations” (Amplicon 6 negative). WT shows the analysis of the HaCaT cells without transfection. Clone numbers are corresponding to those in Figure 3.

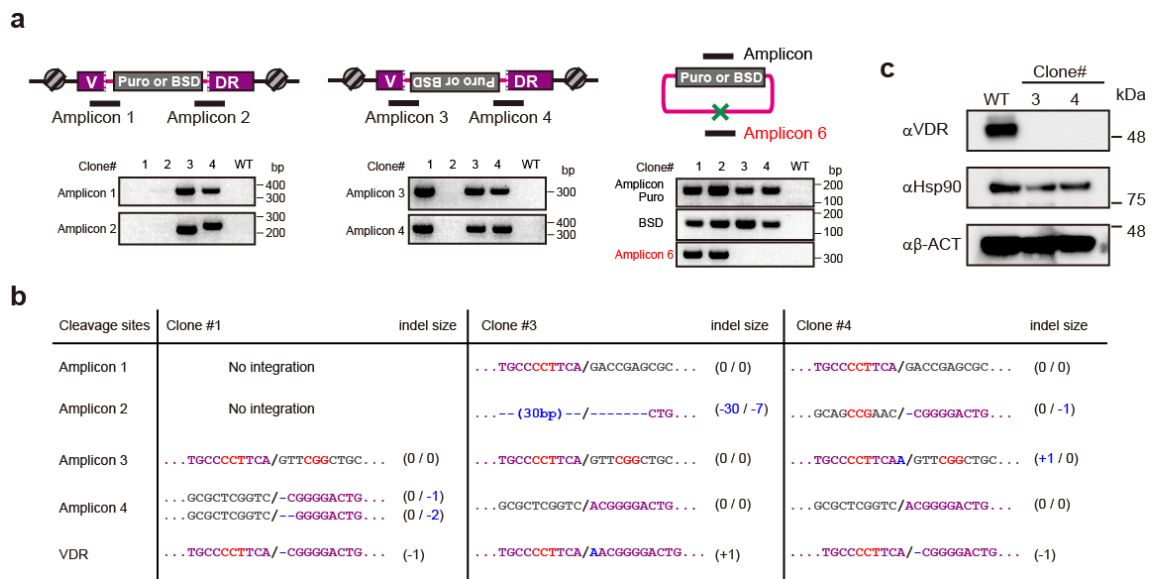

### Supplementary Fig. S4 Simultaneous knock-in of two donor vectors using VIKING method.

(a-c) Simultaneous knock-in of two different vectors. The pVKG1-PURO and pVKG1-BSD were used as donor vectors. (a) Confirmation of directions of integrated donor vectors by PCR analysis. Schematic PCR products were written (Amplicon 1-6). Schematic PCR products are written (Amplicon 1-6). If Amplicon 1 and Amplicon 2 were amplified, the insertion of the donor vector is defined as “the forward direction.” On the other hand, if Amplicon 3 and Amplicon 4 were amplified, it is defined as “the reverse direction.” (b) Direct sequencing analysis of the junctions of the knock-in sites. (c) Immunoblot analyses of isolated clones.  $\alpha$ Hsp90 and  $\alpha\beta$ -ACT were used as loading controls.

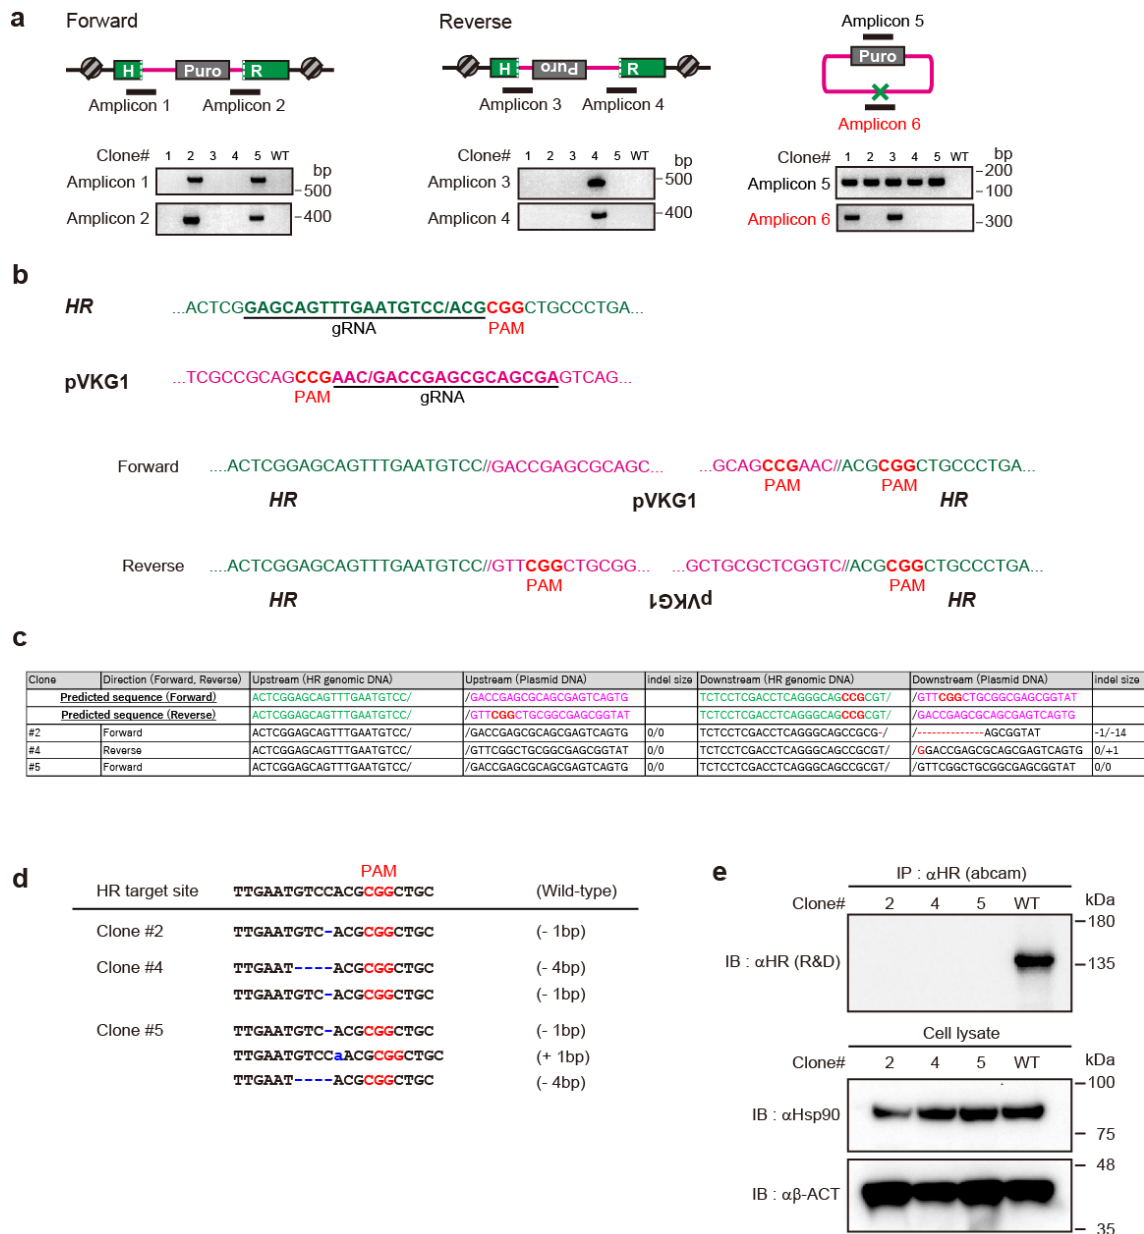

**Supplementary Fig. S5 Isolation of knock-in/knock-out clones in *HR* locus using HaCaT cells.**

(a) Confirmation of directions of integrated donor vectors in *HR* locus by PCR analysis. Schematic PCR products were written (Amplicon 1-6). (b) (Upper) Sequences for cleaving pVKG1-PURO vector (the donor vector) and *HR* locus in the genome. The exact target sites of gRNA were underlined. The PAM sequences were colored in red

and shown in bold. (Lower) The predicted sequence of knock-in products, in which the cleaved donor vector was precisely integrated into the target site. The two possible directions of insertion (forward and reverse) were shown. The cleavage site by Cas9 was shown in slash. (c) The summary of direct sequencing analyses of knock-in clones. The junction sites of the knock-in clones were shown. (d) Sequences of the *HR* locus in the genome of knock-in cell lines analyzed by direct sequencing of PCR product. (e) Immunoblot analyses of isolated clones. Immunoprecipitated products using  $\alpha$ HR (abcam) antibody (Upper) and cell lysates (Lower) were analyzed using  $\alpha$ HR (R&D),  $\alpha$ Hsp90 and  $\alpha$  $\beta$ -ACT antibodies.

**Supplementary Table S1 Design of VKG1 sequence using CRISPRdirect**

Using Homo sapiens genome data (hg19), potential off targets of all the gRNA target sequences in the pUC19 vector were analyzed by CRISPRdirect<sup>35</sup>.

Column1-2: the position of nucleotide and direction of the strand in pUC19. The sequence of pUC19 was obtained from Addgene Plasmid #50005.

Column4: the target sequences of gRNA with PAM. Column5-7: Number of off targets which match the gRNA target sequence of PAM proximal 20 mer (hit\_20mer), 12mer (hit\_12mer), and 8mer (hit\_8mer).

The gRNA target with fewest off target was shown in yellow and its 18 nt truncated version was defined as VKG1.

Ref 35. Naito Y, Hino K, Bono H, Ui-Tei K. CRISPRdirect: software for designing CRISPR/Cas guide RNA with reduced off-target sites. *Bioinformatics* **31**, 1120-1123 (2015).

| # start | end  | strand | sequence                | hit_20mer | hit_12mer | hit_8mer |           |
|---------|------|--------|-------------------------|-----------|-----------|----------|-----------|
| 2642    | 2664 | -      | ccgaacgaccgagcgcagcgagt | 0         | 2         | 82       | VKG1 18nt |
| 1287    | 1309 | +      | ttacttctgacaacgatcgagg  | 0         | 0         | 83       |           |
| 1398    | 1420 | -      | ccaacgacgagcgtgacaccac  | 0         | 0         | 108      |           |
| 25      | 47   | -      | ccccgcgcttgccgattcatt   | 0         | 2         | 168      |           |
| 672     | 694  | -      | ccgaacgacgagcgaaggg     | 0         | 1         | 172      |           |
| 1651    | 1673 | +      | tcgtagtattacacgagggg    | 0         | 1         | 194      |           |
| 568     | 590  | -      | ccgctgacgcccctgacggct   | 0         | 3         | 195      |           |
| 2195    | 2217 | +      | aagacgatagttaccgataagg  | 0         | 2         | 228      |           |
| 2372    | 2394 | +      | cggaacgagagcgacgaggg    | 0         | 3         | 232      |           |
| 27      | 49   | -      | ccgctggtgcccattcattaa   | 0         | 0         | 250      |           |
| 2509    | 2531 | -      | ccagcaacgccccttttaacgg  | 0         | 1         | 258      |           |
| 327     | 349  | -      | cctggcttacccaacttaacg   | 0         | 2         | 272      |           |
| 158     | 180  | -      | ccgctcgtatgtgtggaat     | 0         | 1         | 280      |           |
| 1124    | 1146 | -      | ccgtattgaccccgcgaagc    | 0         | 0         | 281      |           |
| 1645    | 1667 | -      | cccgtatcgtattatcacacg   | 0         | 1         | 282      |           |
| 2358    | 2380 | +      | gtaagcggcagggcgaacagg   | 0         | 0         | 287      |           |
| 1646    | 1668 | -      | ccgtatcgtattatcacacga   | 0         | 2         | 295      |           |
| 1650    | 1672 | +      | atcgtattatcacacgaggg    | 0         | 2         | 295      |           |
| 15      | 37   | +      | aaccgcctctcccgcgttgg    | 0         | 2         | 299      |           |
| 1004    | 1026 | +      | acgagtggtttacatggaactg  | 0         | 2         | 302      |           |
| 2600    | 2622 | -      | ccgtattacccttgagtgag    | 0         | 1         | 307      |           |
| 1116    | 1138 | +      | gtattaccgtattgacccgg    | 0         | 0         | 309      |           |
| 26      | 48   | -      | cccgcgctggccgattcatta   | 0         | 3         | 323      |           |
| 481     | 503  | +      | gccgtattcacaccgataagg   | 0         | 0         | 330      |           |
| 5       | 27   | -      | ccaatacgaacccctctccc    | 0         | 0         | 331      |           |
| 2064    | 2086 | +      | cttctagtgtaccgtagttagg  | 0         | 1         | 341      |           |
| 2168    | 2190 | +      | taagtcgtgtctaccgggtgg   | 0         | 0         | 351      |           |
| 735     | 757  | +      | ataatgcttcttagacgtcagg  | 0         | 3         | 356      |           |
| 298     | 320  | +      | tcgttttaacaagctcgtactg  | 0         | 0         | 361      |           |
| 467     | 489  | -      | ccttacgcactgtgctgattt   | 0         | 0         | 369      |           |
| 2371    | 2393 | +      | tcggaacgagagcgcacgagg   | 0         | 7         | 401      |           |
| 269     | 291  | -      | ccggctaccgagctgaattcac  | 0         | 4         | 402      |           |
| 398     | 420  | -      | ccgacacgacgccctccaac    | 0         | 2         | 417      |           |
| 1284    | 1306 | +      | aacttactctgacacgatcgg   | 0         | 1         | 443      |           |
| 326     | 348  | -      | ccctgcttaccacaactaac    | 0         | 2         | 447      |           |
| 2571    | 2593 | -      | cctgcttaccctgattctgt    | 0         | 2         | 450      |           |
| 1352    | 1374 | +      | tgtaactcctgattgctggg    | 0         | 2         | 457      |           |
| 1351    | 1373 | +      | atgtaactcctgattgctggg   | 0         | 1         | 461      |           |
| 268     | 290  | -      | cccggtaaccgagctgaattca  | 0         | 5         | 469      |           |
| 2430    | 2452 | -      | cctgtcgggtttcccaactctg  | 0         | 0         | 486      |           |
| 2158    | 2180 | -      | ccagtgccgataagtcgtctt   | 0         | 0         | 491      |           |
| 45      | 67   | +      | attaatcgagctggcagcaggg  | 0         | 3         | 496      |           |
| 374     | 396  | +      | cagctggcgaatagcgaagagg  | 0         | 3         | 497      |           |
| 1361    | 1383 | -      | ccttgatggtgggaaccgagc   | 0         | 7         | 503      |           |
| 990     | 1012 | +      | gatcagttgggtgacaggtggg  | 0         | 2         | 512      |           |
| 220     | 242  | -      | ccatgattcggcaagccttgc   | 0         | 1         | 527      |           |
| 2464    | 2486 | +      | gattttgtgatcctgtaggg    | 0         | 4         | 528      |           |
| 397     | 419  | -      | cccgcacgatgcccttcccaa   | 0         | 1         | 542      |           |
| 431     | 453  | -      | cctgaatggcgaatggcctga   | 0         | 2         | 552      |           |
| 4       | 26   | -      | ccaatacgaacccctctccc    | 0         | 4         | 554      |           |
| 1203    | 1225 | +      | acagaaaagcattcagatgg    | 0         | 2         | 555      |           |
| 1649    | 1671 | +      | tatcgtattatctacacgagg   | 0         | 4         | 561      |           |
| 2275    | 2297 | -      | cctacaccgaactgagataccta | 0         | 2         | 563      |           |
| 2355    | 2377 | -      | ccggtaacgcccagggcgaac   | 0         | 7         | 566      |           |
| 1642    | 1664 | -      | cctccgtatcgtattatctac   | 0         | 0         | 569      |           |
| 1117    | 1139 | +      | tattaccgtattgacccggg    | 0         | 0         | 575      |           |
| 57      | 79   | +      | ggcacgacaggttcccactgg   | 0         | 3         | 575      |           |
| 276     | 298  | -      | ccgagctcgaattcaactggcgt | 0         | 2         | 587      |           |
| 2465    | 2487 | +      | attttgtgatcctgtaggg     | 0         | 2         | 587      |           |
| 1641    | 1663 | -      | ccctccgtatcgtattatcta   | 0         | 0         | 592      |           |
| 1854    | 1876 | -      | ccttaactgagtttcttcca    | 0         | 4         | 594      |           |
| 2347    | 2369 | +      | acaggtatccgtaagcggcagg  | 0         | 4         | 597      |           |
| 919     | 941  | -      | cctttttcggcatttgcctt    | 0         | 1         | 618      |           |
| 299     | 321  | +      | cgttttacaactcgtgactggg  | 0         | 0         | 646      |           |
| 2466    | 2488 | +      | ttttgtgatcctgtagggg     | 0         | 2         | 651      |           |
| 2343    | 2365 | +      | gggacaggtatccgtaagcgg   | 0         | 1         | 659      |           |
| 363     | 385  | -      | cccccttccagctggcgtaa    | 0         | 3         | 665      |           |
| 2220    | 2242 | +      | cagcggctgggctaacggggg   | 0         | 6         | 688      |           |
| 2463    | 2485 | +      | cgattttgtgatgctcagg     | 0         | 1         | 696      |           |
| 267     | 289  | -      | ccccgggtaccgactcgaattc  | 0         | 2         | 701      |           |
| 989     | 1011 | +      | agatcagttgggtcagcagttg  | 0         | 6         | 703      |           |
| 1588    | 1610 | -      | ccggtgagcgtggctcgcggt   | 0         | 4         | 710      |           |
| 365     | 387  | -      | cccttccgacgtggcgtata    | 0         | 7         | 722      |           |
| 762     | 784  | +      | acttttgggaaatgctgcgg    | 0         | 5         | 735      |           |
| 1061    | 1083 | -      | ccccgaagaacgtttccaatga  | 0         | 0         | 737      |           |
| 579     | 601  | -      | ccctgacggcttctctctccc   | 0         | 3         | 748      |           |
| 580     | 602  | -      | cctgacggcttctctctccc    | 0         | 1         | 756      |           |
| 366     | 388  | -      | cccttccagctggcgtatag    | 0         | 9         | 757      |           |
| 1853    | 1875 | -      | cccttaactgagtttctgtcc   | 0         | 2         | 769      |           |



**Supplementary Table S2 Direct sequencing analysis of Knock-in cell lines**

The sequences of PCR amplicon 1 - 4 in Fig.3B, which were analyzed by direct sequencing, were shown. The predicted sequences with forward and reverse direction were shown in colored sequences. PAM sequences were shown with red and bold. The indel were colored with red. The predicted sequences show the sequences with precise knocked-in (see also Supplementary Fig. S2).

| Clone | Direction (Forward, Reverse) | Upstream (VDR genomic DNA)          | Upstream (Plasmid DNA)                      | indel size | Downstream (VDR genomic DNA)        | Downstream (Plasmid DNA)                          | indel size                                        | Amplicon 6 |
|-------|------------------------------|-------------------------------------|---------------------------------------------|------------|-------------------------------------|---------------------------------------------------|---------------------------------------------------|------------|
|       |                              | <b>Predicted sequence (Forward)</b> | CATGAAGCGGAAGGCCTATTACCTGCC <b>CCTT</b> CA/ |            | GACCGAGCGCAGCGAGTCAGTG              | GTCGGTTGCCTTGGTGATGCGGCAGTCCCGT/                  | <b>/GTT<b>CGG</b>CTGCGGCAGCGGATCAGCTCACTCAAAG</b> |            |
|       |                              | <b>Predicted sequence (Reverse)</b> | CATGAAGCGGAAGGCCTATTACCTGCC <b>CCTT</b> CA/ |            | <b>/GTT<b>CGG</b>CTGCGGCAGCGGAT</b> | GTCGGTTGCCTTGGTGATGCGGCAGTCCCGT/                  | <b>/GACCGAGCGCAGCGAGTCAGTG</b>                    |            |
| #1    | Forward                      | CATGAAGCGGAAGGCCTATTACCTGCCCTTCA/   | /GACCGAGCGCAGCGAGTCAGTG                     | 0/0        | GTCGGTTGCCTTGGTGATGCGGCAGTCCCGT/    | /GTT <b>CGG</b> CTGCGGCAGCGGATCAGCTCACTCAAAG      | 0/0                                               | negative   |
| #5    | Reverse                      | CATGAAGCGGAAGGCCTATTACCTGCCCTTCA/   | /GTT <b>CGG</b> CTGCGGCAGCGGAT              | 0/0        | GTCGGTTGCCTTGGTGATGCGGCAGTCCCGT/    | /GACCGAGCGCAGCGAGTCAGTG                           | 0/0                                               | negative   |
| #9    | Reverse                      | CATGAAGCGGAAGGCCTATTACCTGCCCTTCA/   | /GTT <b>CGG</b> CTGCGGCAGCGGAT              | 0/0        | GTCGGTTGCCTTGGTGATGCGGCAGTCCCGT/    | /GACCGAGCGCAGCGAGTCAGTG                           | 0/0                                               | negative   |
| #12   | Forward                      | CATGAAGCGGAAGGCCTATTACCTGCCCTTCA/   | /GACCGAGCGCAGCGAGTCAGTG                     | 0/0        | GTCGGTTGCCTTGGTGATGC-----/          | /GTT <b>CGG</b> CTGCGGCAGCGGATCAGCTCACTCAAAG      | -12/0                                             | negative   |
| #14   | Forward                      | CATGAAGCGGAAGGCCTATTACCTGCCCTTCA/   | /GACCGAGCGCAGCGAGTCAGTG                     | 0/0        | GTCGGTTGCCTTGGTGATGCGGCAGTCCCGT/    | /GTT <b>CGG</b> CTGCGGCAGCGGATCAGCTCACTCAAAG      | 0/0                                               | negative   |
| #15   | Reverse                      | CATGAAGCGGAAGGCCTATTACCTGCCCTTCA/   | /GTT <b>CGG</b> CTGCGGCAGCGGAT              | 0/0        | GTCGGTTGCCTTGGTGATGCGGCAGTCCCGT/    | /GACCGAGCGCAGCGAGTCAGTG                           | 0/0                                               | negative   |
| #16   | Reverse                      | CATGAAGCGGAAGGCCTATTACCTGCCCTTCA/   | /GTT <b>CGG</b> CTGCGGCAGCGGAT              | 0/0        | GTCGGTTGCCTTGGTGATGCGGCAGTCCCGT/    | /GACCGAGCGCAGCGAGTCAGTG                           | -2/0                                              | negative   |
| #17   | Reverse                      | CATGAAGCGGAAGGCCTATTACCTGCCCTTCA/   | /GTT <b>CGG</b> CTGCGGCAGCGGAT              | 0/0        | GTCGGTTGCCTTGGTGATGCGGCAGTCCCGT/    | /-----AGCGAGTCAGTG                                | -4/-10                                            | negative   |
| #21   | Forward                      | CATGAAGCGGAAGGCCTATTACCTGCCCTTCA/   | /GACCGAGCGCAGCGAGTCAGTG                     | 0/0        | GTCGGTTGCCTTGGTGATGCGGCAGTCCCGT/    | /GTT <b>CGG</b> CTGCGGCAGCGGATCAGCTCACTCAAAG      | 0/0                                               | negative   |
| #26   | Forward                      | CATGAAGCGGAAGGCCTATTACCTGCCCTTCA/   | /GACCGAGCGCAGCGAGTCAGTG                     | 0/0        | GTCGGTTGCCTTGGTGATGCGGCAGTCCCGT/    | /GTT <b>CGG</b> CTGCGGCAGCGGATCAGCTCACTCAAAG      | 0/0                                               | negative   |
| #29   | Reverse                      | CATGAAGCGGAAGGCCTATTACCTGCCCTTCA/   | /GTT <b>CGG</b> CTGCGGCAGCGGAT              | 0/0        | GTCGGTTGCCTTGGTGATGCGGCAGTCCCGT/    | /GACCGAGCGCAGCGAGTCAGTG                           | 0/0                                               | negative   |
| #30   | Forward                      | CATGAAGCGGAAGGCCTATTACCTGCCCTTCA/   | /GACCGAGCGCAGCGAGTCAGTG                     | 0/0        | GTCGGTTGCCTTGGTGATGCGGCAGTCCCGT/    | /GTT <b>CGG</b> CTGCGGCAGCGGATCAGCTCACTCAAAG      | 0/0                                               | negative   |
| #33   | Forward                      | CATGAAGCGGAAGGCCTATTACCTGCCCTTCA/   | /GACCGAGCGCAGCGAGTCAGTG                     | 0/0        | GTCGGTTGC-----/                     | /-----AGCTCACTCAAAG                               | -23/-23                                           | negative   |
| #35   | Forward                      | CATGAAGCGGAAGGCCTATTACCTGCCCTTCA/   | /GACCGAGCGCAGCGAGTCAGTG                     | 0/0        | GTCGGTTGCCTTGGTGATGCGG-----/        | <b>/GTT<b>CGG</b>CTGCGGCAGCGGATCAGCTCACTCAAAG</b> | -10/+1                                            | negative   |
| #38   | Reverse                      | CATGAAGCGGAAGGCCTATTACCTGCCCTTCA/A  | /GTT <b>CGG</b> CTGCGGCAGCGGAT              | +1/0       | GTCGGTTGCCTTGGTGATGCGGCAGTCCCGT/    | /GACCGAGCGCAGCGAGTCAGTG                           | 0/0                                               | negative   |
| #40   | Forward                      | CATGAAGCGGAAGGCCTATTACCTGCCCTTCA/   | /GACCGAGCGCAGCGAGTCAGTG                     | 0/0        | GTCGGTTGCCTTGGTGATGCGGCAGTCCCGT/    | /GTT <b>CGG</b> CTGCGGCAGCGGATCAGCTCACTCAAAG      | -2/0                                              | negative   |
| #41   | Forward                      | CATGAAGCGGAAGGCCTATTACCTGCCCTTCA/   | /GACCGAGCGCAGCGAGTCAGTG                     | 0/0        | GTCGGT-----/                        | /GTT <b>CGG</b> CTGCGGCAGCGGATCAGCTCACTCAAAG      | -27/0                                             | negative   |
| #44   | Forward                      | CATGAAGCGGAAGGCCTATTACCTGCCCTTCA/   | /GACCGAGCGCAGCGAGTCAGTG                     | 0/0        | GTCGGTTGCCTTGGTGATGCGGCAGTCCCGT/    | /GTT <b>CGG</b> CTGCGGCAGCGGATCAGCTCACTCAAAG      | 0/0                                               | negative   |

**Supplementary Table S3 Direct sequencing of additional knock-in clones**

The sequences of knock-in clones in addition to the supplementary fig.2, which were analyzed by direct sequencing, were shown. The predicted sequences with forward and reverse direction were shown in colored sequences. PAM sequences were shown with red and bold. The indel were colored with red. The predicted sequences show the sequences with precise knocked-in (see also Supplementary Fig. S2).

| Clone                               | Upstream (VDR genomeDNA)                    | Upstream (Plasmid DNA)                    | indel size | Downstream (VDR genomeDNA)         | Downstream (Plasmid DNA)                       | indel size             | Amplicon 6 |
|-------------------------------------|---------------------------------------------|-------------------------------------------|------------|------------------------------------|------------------------------------------------|------------------------|------------|
| <b>Predicted sequence (Forward)</b> | CATGAAGCGGAAGGCACTATTACCTGCC <b>CCT</b> CA/ | /GACCGAGCGCAGCGAGT <b>CAGTG</b>           |            | GTCGGTTGTCCTTGGTGATGCGGCAGTCCCCGT/ | /GTT <b>CGG</b> CTGCGGCGAGCGGTATCAGCTCACTCAAAG |                        |            |
| <b>Predicted sequence(Reverse)</b>  | CATGAAGCGGAAGGCACTATTACCTGCC <b>CCT</b> CA/ | /GTT <b>CGG</b> CTGCGGCGAGCGGTAT          |            | GTCGGTTGTCCTTGGTGATGCGGCAGTCCCCGT/ | /GACCGAGCGCAGCGAGT <b>CAGTG</b>                |                        |            |
| #2                                  | CATGAAGCGGAAGGCACTATTACCTGCCCTTCA/          | /GACCGAGCGCAGCGAGT <b>CAGTG</b>           | 0/0        | GTCGGTTGTCCTTGGTGATGCGGCAGTCCCCGT/ | /GACCGAGCGCAGCGAGT <b>CAGTG</b>                | 0/0                    | negative   |
| #3                                  | n. d.                                       | n. d.                                     |            | n. d.                              | n. d.                                          |                        | positive   |
| #4                                  | n. d.                                       | n. d.                                     |            | n. d.                              | n. d.                                          |                        | negative   |
| #6                                  | n. d.                                       | n. d.                                     |            | n. d.                              | n. d.                                          |                        | positive   |
| #7                                  | n. d.                                       | n. d.                                     |            | n. d.                              | n. d.                                          |                        | positive   |
| #8                                  | n. d.                                       | n. d.                                     |            | n. d.                              | n. d.                                          |                        | negative   |
| #10                                 | CATGAAGCGGAAGGCACTATTACCTGCCCTTCA/          | /GACCGAGCGCAGCGAGT <b>CAGTG</b>           | 0/0        | GTCGGTTGTCCTTGGTGATGCGGCAGTCCCCGT/ | /GTT <b>CGG</b> CTGCGGCGAGGAGTATCAGCTCACTCAAAG | 0/0                    | negative   |
| #11                                 | n. d.                                       | n. d.                                     |            | n. d.                              | n. d.                                          |                        | positive   |
| #13                                 | n. d.                                       | n. d.                                     |            | n. d.                              | n. d.                                          |                        | positive   |
| #18                                 | n. d.                                       | n. d.                                     |            | n. d.                              | n. d.                                          |                        | positive   |
| #19                                 | CATGAAGCGGAAGGCACTATTACCTGCCCTTCA/          | /GACCGAGCGCAGCGAGT <b>CAGTG</b>           | 0/0        | GTCGGTTGTCCTTGGTGATGCGGCAGTCCCCGT/ | /GTT <b>CGG</b> CTGCGGCGAGGAGTATCAGCTCACTCAAAG | 0/0                    | negative   |
| #20                                 | n. d.                                       | n. d.                                     |            | n. d.                              | n. d.                                          |                        | positive   |
| #22                                 | n. d.                                       | n. d.                                     |            | n. d.                              | n. d.                                          |                        | negative   |
| #23                                 | n. d.                                       | n. d.                                     |            | n. d.                              | n. d.                                          |                        | negative   |
| #24                                 | CATGAAGCGGAAGGCACTATTACCTGCCCTTCA/          | /GACCGAGCGCAGCGAGT <b>CAGTG</b>           | 0/0        | GTCGGTTGTCCTTGGTGATGCGGCAGTCCCCGT/ | /GACCGAGCGCAGCGAGT <b>CAGTG</b>                | 0/0                    | negative   |
| #25                                 | n. d.                                       | n. d.                                     |            | n. d.                              | n. d.                                          |                        | positive   |
| #27                                 | n. d.                                       | n. d.                                     |            | n. d.                              | n. d.                                          |                        | positive   |
| #28                                 | n. d.                                       | n. d.                                     |            | n. d.                              | n. d.                                          |                        | negative   |
| #31                                 | CATGAAGCGGAAGGCACTATTACCTGCCCTTCA/A         | /GTT <b>CGG</b> CTGCGGCGAGCGGTAT          | +1/0       | GTCGG-----/                        | /-----CAAAG                                    | -42/-46                | negative   |
| #32                                 | n. d.                                       | n. d.                                     |            | n. d.                              | n. d.                                          |                        | positive   |
| #34                                 | n. d.                                       | n. d.                                     |            | n. d.                              | n. d.                                          |                        | negative   |
| #36                                 | n. d.                                       | n. d.                                     |            | n. d.                              | n. d.                                          |                        | negative   |
| #37                                 | CATGAAGCGGAAGGCACTATTACCTGCCCTTCA/A         | /GTT <b>CGG</b> CTGCGGCGAGCGGTAT          | +1/0       | GTCGGTTGTCCTTGGTGATGCGGCAGTCCCCGT/ | /GACCGAGCGCAGCGAGT <b>CAGTG</b>                | 0/0                    | negative   |
| #39                                 | n. d.                                       | n. d.                                     |            | n. d.                              | n. d.                                          |                        | positive   |
| #42                                 | n. d.                                       | n. d.                                     |            | n. d.                              | n. d.                                          |                        | negative   |
| #43                                 | n. d.                                       | n. d.                                     |            | n. d.                              | n. d.                                          |                        | positive   |
| #45                                 | CATGAAGCGGAAGGCACT-----/                    | /--(412bp)--CTCGCTTAACGCTAGGATGGATGTTTT   | -17/-412   | n. d.                              | n. d.                                          |                        | negative   |
| #46                                 | n. d.                                       | n. d.                                     |            | n. d.                              | n. d.                                          |                        | negative   |
| #47                                 | n. d.                                       | n. d.                                     |            | n. d.                              | n. d.                                          |                        | negative   |
| #48                                 | n. d.                                       | n. d.                                     |            | n. d.                              | n. d.                                          |                        | negative   |
| #49                                 | CATGAAGCGGAAGGCACTATTACCTGCCCTTCA/A         | /GTT <b>CGG</b> CTGCGGCGAGCGGTAT          | +1/0       | GTCGGTTGTCCTTGGTGATGCGGCAGTCCCCGT/ | /GACCGAGCGCAGCGAGT <b>CAGTG</b>                | 0/0                    | negative   |
| #50                                 | n. d.                                       | n. d.                                     |            | n. d.                              | n. d.                                          |                        | positive   |
| #51                                 | n. d.                                       | n. d.                                     |            | n. d.                              | n. d.                                          |                        | positive   |
| #52                                 | CATGAAGCGGAAGGCACTATTACCTGCCCTTCA/          | /Cas9 sequence (AAGCACGAGCGCACCCATCTT...) | 0/Cas9     | GTCGGTTGTCCTTGGTGATGCGGCAGTCCCCGT/ | /GTT <b>CGG</b> CTGCGGCGAGGAGTATCAGCTCACTCAAAG | 0/0                    | negative   |
| #53                                 | n. d.                                       | n. d.                                     |            | n. d.                              | n. d.                                          |                        | positive   |
| #54                                 | n. d.                                       | n. d.                                     |            | n. d.                              | n. d.                                          |                        | positive   |
| #55                                 | CATGAAGCGGAAGGCACTATTACCTGCCCTTCA/          | /GACCGAGCGCAGCGAGT <b>CAGTG</b>           | 0/0        | n. d.                              | n. d.                                          |                        | negative   |
| #56                                 | CATGAAGCGGAAGGCACTATTACCTGCCCTTCA/          | /GTT <b>CGG</b> CTGCGGCGAGCGGTAT          | 0/0        | GTCGGTTGTCCTTGGTGATGCGGCAGTCCCCGT/ | /GACCGAGCGCAGCGAGT <b>CAGTG</b>                | 0/0                    | negative   |
| #57                                 | CATGAAGCGGAAGGCACTATTACCTGCCCTTCA/          | /GTT <b>CGG</b> CTGCGGCGAGCGGTAT          | 0/0        | GTCGGTTGTCCTTGGTGATGCGGCAGTCCCCGT/ | /GACCGAGCGCAGCGAGT <b>CAGTG</b>                | 0/0                    | negative   |
| #58                                 | CATGAAGCGGAAGGCACTATTACCTGCCCTTCA/A         | /GTT <b>CGG</b> CTGCGGCGAGCGGTAT          | +1/0       | GTCGGTTGTCCTTGGTGATGCGGCAGTCCCCGT/ | /GACCGAGCGCAGCGAGT <b>CAGTG</b>                | 0/0                    | negative   |
| #59                                 | CATGAAGCGGAAGGCACTATTACCTGCCCTTCA/          | /GTT <b>CGG</b> CTGCGGCGAGCGGTAT          | 0/0        | GTCGGTTGTCCTTGGTGATGCGGCAGTCCCCGT/ | /GACCGAGCGCAGCGAGT <b>CAGTG</b>                | 0/0                    | negative   |
| #60                                 | n. d.                                       | n. d.                                     |            | n. d.                              | n. d.                                          |                        | positive   |
| #61                                 | CATGAAGCGGAAGGCACTATTACCTGCCCTTCA/          | /GTT <b>CGG</b> CTGCGGCGAGCGGTAT          | 0/0        | GTCGGTTGTCCTTGGTGATGCGGCAGTCCCCGT/ | /GACCGAGCGCAGCGAGT <b>CAGTG</b>                | 0/0                    | negative   |
| #62                                 | CATGAAGCGGAAGGCACTATTACCTGCCCTTCA/          | /GTT <b>CGG</b> CTGCGGCGAGCGGTAT          | 0/0        | GTCGGTTGTCCTTGGTGATGCGGCAGTCCCCGT/ | /GACCGAGCGCAGCGAGT <b>CAGTG</b>                | 0/0                    | negative   |
| #63                                 | CATGAAGCGGAAGGCACTATTACCTGCCCTTCA/          | /GTT <b>CGG</b> CTGCGGCGAGCGGTAT          | 0/0        | GTCGGTTGTCCTTGGTGATGCGGCAGTCCCCGT/ | /GACCGAGCGCAGCGAGT <b>CAGTG</b>                | 0/0                    | negative   |
| #64                                 | CATGAAGCGGAAGGCACTATTACCTGCCCTTCA/          | /GTT <b>CGG</b> CTGCGGCGAGCGGTAT          | 0/0        | GTCGGTTGTCCTTGGTGATGCGGCAGTCCCCGT/ | /GACCGAGCGCAGCGAGT <b>CAGTG</b>                | 0/0                    | negative   |
| #65                                 | CATGAAGCGGAAGGCACTATTACCTGCCCTTCA/          | /GACCGAGCGCAGCGAGT <b>CAGTG</b>           | 0/0        | GTCGGTTGTCCTTGGT-----/             | /GTT <b>CGG</b> CTGCGGCGAGGAGTATCAGCTCACTCAAAG | -17/0 (1nt overlapped) | negative   |
| #66                                 | CATGAAGCGGAAGGCACTATTACCTGCCCTTCA/          | /GACCGAGCGCAGCGAGT <b>CAGTG</b>           | 0/0        | GTCGGTTGTCCTTGGTGATGCGGCAGTCCCCGT/ | /GTT <b>CGG</b> CTGCGGCGAGGAGTATCAGCTCACTCAAAG | 0/0                    | negative   |
| #67                                 | CATGAAGCGGAAGGCACTATTACCTGCCCTTCA/          | /GTT <b>CGG</b> CTGCGGCGAGCGGTAT          | 0/0        | GTCGGTTGTCCTTGGTGATGCGGCAGTCCCCGT/ | /GACCGAGCGCAGCGAGT <b>CAGTG</b>                | 0/0                    | negative   |
| #68                                 | CATGA-----/                                 | /GTT <b>CGG</b> CTGCGGCGAGCGGTAT          | -30/0      | GTCGGTTGTCCTTGGTGATGCGGCAGTCCCC- / | /GACCGAGCGCAGCGAGT <b>CAGTG</b>                | -2/0 (1nt overlapped)  | negative   |
| #69                                 | CATGAAGCGGAAGGCACTATTACCTGCCCTTCA/          | /GTT <b>CGG</b> CTGCGGCGAGCGGTAT          | 0/0        | GTCGGTTGTCCTTGGTGATGCGGCAGTCCCCGT/ | /GACCGAGCGCAGCGAGT <b>CAGTG</b>                | 0/0                    | negative   |
| #70                                 | CATGAAGCGGAAGGCACTATTACCTGCCCTTCA/          | /GACCGAGCGCAGCGAGT <b>CAGTG</b>           | 0/0        | GTCGGTTGTCCTTGGTGATGCGGCAGTCCCCGT/ | /GTT <b>CGG</b> CTGCGGCGAGGAGTATCAGCTCACTCAAAG | 0/0                    | negative   |

**Supplementary Table S4 Summary of sequencing analysis of *VDR* alleles and functional assays of the *VDR* gene**

Column1: clone number in which knock-in event was confirmed. Column2: the sequence detected by direct sequencing analysis of *VDR* gene in the knock-in clones

Column3-5: Summary of the results shown in Fig. 4

| Clone | Indel mutations              | VDR protein expression | <i>CYP24A1</i> induction | Reporter responsiveness |
|-------|------------------------------|------------------------|--------------------------|-------------------------|
| #1    | delta 2bp                    | undetectable           | no induction             | nonresponsive           |
| #5    | delta 2bp, +1bp              | undetectable           | no induction             | nonresponsive           |
| #9    | delta 1bp, +1bp              |                        |                          |                         |
| #12   | delta 2bp, delta 3bp         |                        |                          |                         |
| #14   | delta 1bp, delta 2bp         |                        |                          |                         |
| #15   | delta 1bp                    |                        |                          |                         |
| #16   | delta 2 bp, Wild-type        |                        |                          |                         |
| #17   | +1bp                         |                        |                          |                         |
| #21   | delta 1bp, +1bp              |                        |                          |                         |
| #26   | delta 13bp, delta 10bp, +4bp |                        |                          |                         |
| #29   | delta 1bp, +1bp              | undetectable           | no induction             | nonresponsive           |
| #30   | delta 1bp, delta 2bp         |                        |                          |                         |
| #33   | delta 120bp, delta 1bp, +1bp | undetectable           | no induction             | nonresponsive           |
| #35   | delta 1bp, delta 10bp        | undetectable           | no induction             |                         |
| #38   | delta 4bp                    |                        |                          |                         |
| #40   | delta 1bp, delta 2bp         | undetectable           | no induction             |                         |
| #41   | delta 3bp                    |                        |                          |                         |
| #44   | delta 1bp, delta 3bp         |                        |                          |                         |

**Supplementary Table S5 Primers used in this study**

| Name                    | Sequence                                                                               | Construct name         | Backbone plasmid |
|-------------------------|----------------------------------------------------------------------------------------|------------------------|------------------|
| Puro                    | 5'-GTGGCGCGCCGGCCGCGAAGGATCTG-3'<br>5'-ACTTAATTAATAAGATACATTGATGAG-3'                  | pVKG1-Puro             | pENTR            |
| EGFP_pA                 | 5'-ATTCTAGAGCTAGCGATGGTGAGCAAGGGCGAGG-3'<br>5'-ATTTAAATTCGAATT ATAAGATACATTGATGAGTT-3' | pGFP-RFPuro            | pCDH             |
| SV40promoter_BSD_pA     | 5'-CACCGGATCCGGCTGTGGAATGTG-3'<br>5'-CCAGACATGATAAGATACATTGATG-3'                      | pVKG1-BSD              | pENTR            |
| human_CYP24A1_PromoterS | 5'-AAACTCGAGATTGTGCAAGCGCCGGCGGC-3'<br>5'-AAAGATATCATGTTCTATGCCAGGGAC-3'               | pVDRE-Luc              | pGL4.27          |
| human_VDR               | 5'-AAAGAATTCATGGAGGCAATGGCGGCCAG-3'<br>5'-AAACTCGAGTCAGGAGATCTCATTGCCAAAC-3'           | hVDR expression vector | pcDNA3FLAG       |

| Name                           | Sequence                                                  | Primer name                            |
|--------------------------------|-----------------------------------------------------------|----------------------------------------|
| Amplicon_1_for_VDR (Fig. 1d)   | 5'-TTCCTGTCTAGCGGTACGCG-3'<br>5'-GGTGGCCTCATGTCTTCTG-3'   | VKG1_250R<br>VDRgenome_del3F           |
| Amplicon_2_for_VDR (Fig. 1d)   | 5'-GCCTATGGAAAAACGCCAGC-3'<br>5'-CCTTCATCATGCCGATGTCC-3'  | VKG1_4561F<br>VDRgenome_del1R          |
| Amplicon_3_for_VDR (Fig. 1d)   | 5'-GCCTATGGAAAAACGCCAGC-3'<br>5'-GGTGGCCTCATGTCTTCTG-3'   | VKG1_4561F<br>VDRgenome_del3F          |
| Amplicon_4_for_VDR (Fig. 1d)   | 5'-TTCCTGTCTAGCGGTACGCG-3'<br>5'-TGCCCAAACCTGCAGGAGAG-3'  | VKG1_250R<br>VDRgenome_del3R           |
| Amplicon_5_for_VDR (Fig. 1d)   | 5'-ATGGCCGAGTTGAGCGGTTTC-3'<br>5'-AGACCCTTGCCCTGGTGGTC-3' | PuroF<br>PuroR                         |
| Amplicon_6_for_VDR (Fig. 1d)   | 5'-GCCTATGGAAAAACGCCAGC-3'<br>5'-TTCCTGTCTAGCGGTACGCG-3'  | VKG1_4561F<br>VKG1_250R                |
| Amplicon_1_for_AAVS1 (Fig. 2d) | 5'-GGAAATGGGGGTGTGTCACC-3'<br>5'-GGGTCTTGTAGTTGCCGTCG-3'  | AAVS_F5<br>EGFP_R2                     |
| Amplicon_2_for_AAVS1 (Fig. 2d) | 5'-CCCTACCCCTTACCTCTC-3'<br>5'-GCAGAGCTCGTTTAGTGAACCG-3'  | AAVS_R6<br>EGFP_F4                     |
| Amplicon_3_for_AAVS1 (Fig. 2d) | 5'-GGAAATGGGGGTGTGTCACC-3'<br>5'-AACCGTCAGATCGCCTGGAG-3'  | AAVS_F5<br>EGFP_F2                     |
| Amplicon_4_for_AAVS1 (Fig. 2d) | 5'-ACCTCTCTAGTCTGTGCTAGC-3'<br>5'-GGGTCTTGTAGTTGCCGTCG-3' | AAVS_R5<br>EGFP_R2                     |
| Amplicon_5_for_AAVS1 (Fig. 2d) | 5'-AACCGTCAGATCGCCTGGAG-3'<br>5'-GGGTCTTGTAGTTGCCGTCG-3'  | EGFP_F2<br>EGFP_R2                     |
| Amplicon_Puro (Fig. 2d)        | 5'-ATGGCCGAGTTGAGCGGTTTC-3'<br>5'-AGACCCTTGCCCTGGTGGTC-3' | PuroF<br>PuroR                         |
| VDR cleaving site (Fig. 3d)    | 5'-GGTGGCCTCATGTCTTCTG-3'<br>5'-TGCCCAAACCTGCAGGAGAG-3'   | VDRgenome_del3F<br>VDRgenome_del3R     |
| hCYP24A1_qPCR (Fig. 4b)        | 5'-CAGCGAAGTGAACAATGGTCG-3'<br>5'-GCTCGACTGGAGTGACCATC-3' | hCYP24A1_qPCR_For<br>hCYP24A1_qPCR_Rev |
| hACTB_qPCR (Fig. 4b)           | 5'-ATTGGCAATGAGCGGTTTC-3'<br>5'-CGTGGATGCCACAGGACT-3'     | hACTB_qPCR_For<br>hACTB_qPCR_Rev       |
| Amplicon_BSD (Fig. S4a)        | 5'-CTGAAGACTACAGCGTCGCC-3'<br>5'-TTCTCATTCCGATCGCGACG-3'  | BSD_F<br>BSD_R                         |
| Amplicon_1_for_HR (Fig. S5a)   | 5'-TTCCTGTCTAGCGGTACGCG-3'<br>5'-TGCACCAGAGGATGGAGAG-3'   | VKG1_250R<br>HRgenome_F2               |
| Amplicon_2_for_HR (Fig. S5a)   | 5'-GCCTATGGAAAAACGCCAGC-3'<br>5'-TCATGCTGTCCCAGTCCAC-3'   | VKG1_4561F<br>HRgenome_R1              |
| Amplicon_3_for_HR (Fig. S5a)   | 5'-GCCTATGGAAAAACGCCAGC-3'<br>5'-GCGATGGGAACCTTGGGTAC-3'  | VKG1_4561F<br>HRgenome_F1              |
| Amplicon_4_for_HR (Fig. S5a)   | 5'-TTCCTGTCTAGCGGTACGCG-3'<br>5'-TCATGCTGTCCCAGTCCAC-3'   | VKG1_250R<br>HRgenome_R1               |
| Amplicon_5_for_HR (Fig. S5a)   | 5'-ATGGCCGAGTTGAGCGGTTTC-3'<br>5'-AGACCCTTGCCCTGGTGGTC-3' | PuroF<br>PuroR                         |
| Amplicon_6_for_HR (Fig. S5a)   | 5'-GCCTATGGAAAAACGCCAGC-3'<br>5'-TTCCTGTCTAGCGGTACGCG-3'  | VKG1_4561F<br>VKG1_250R                |

# Supplemental information

## Figure 1d

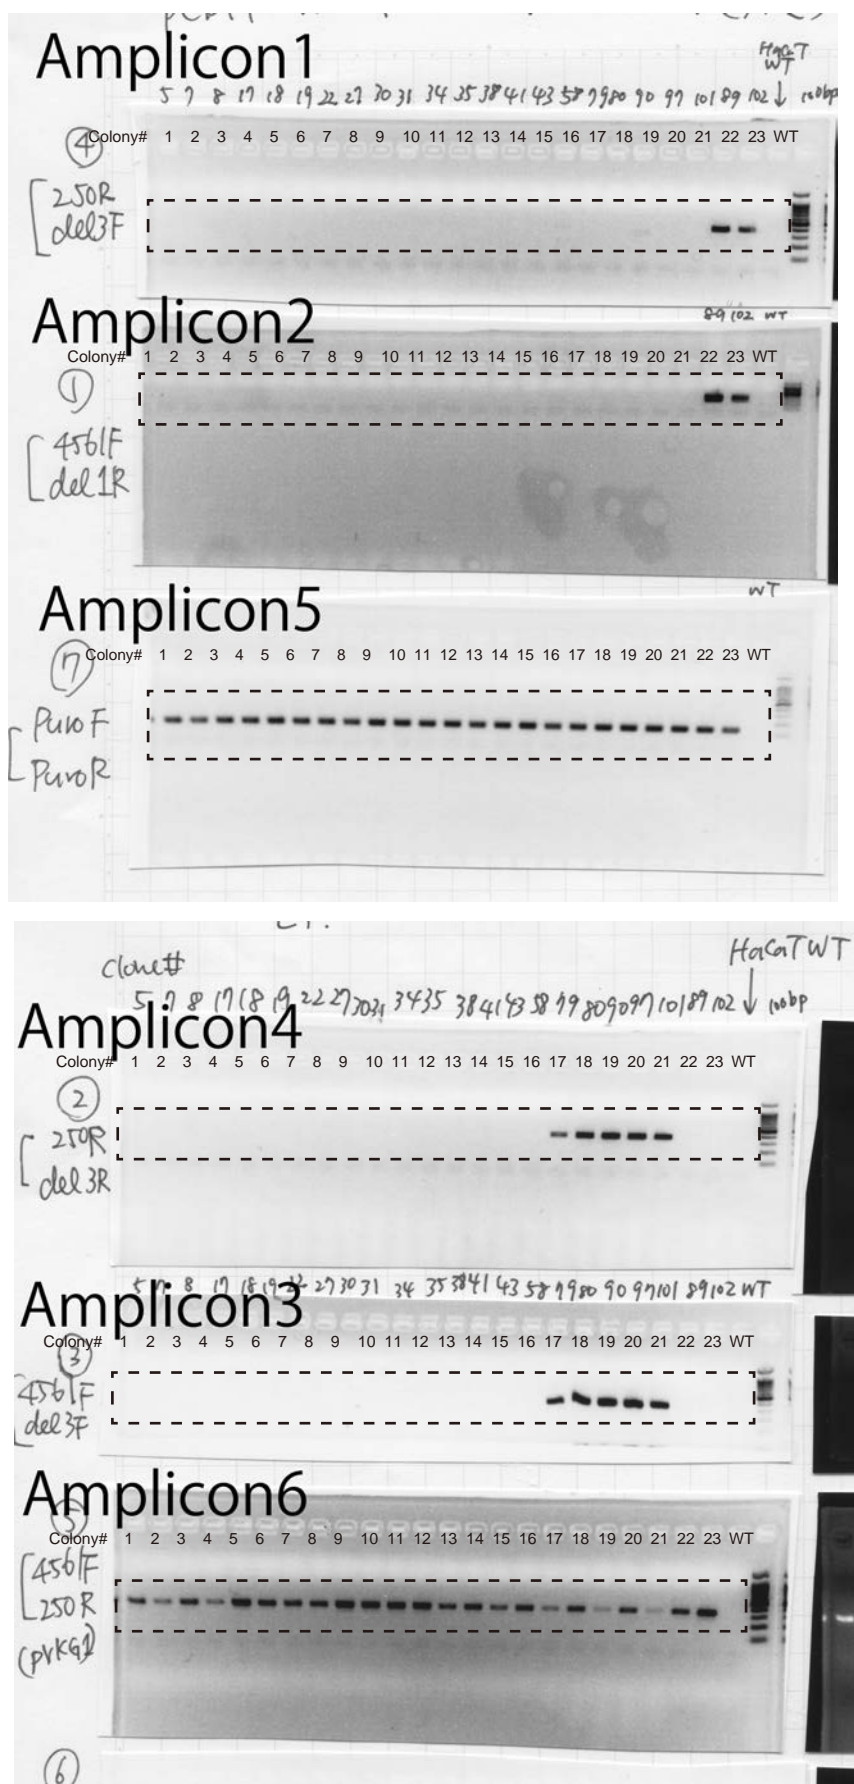

# Supplemental information

## Figure 2d

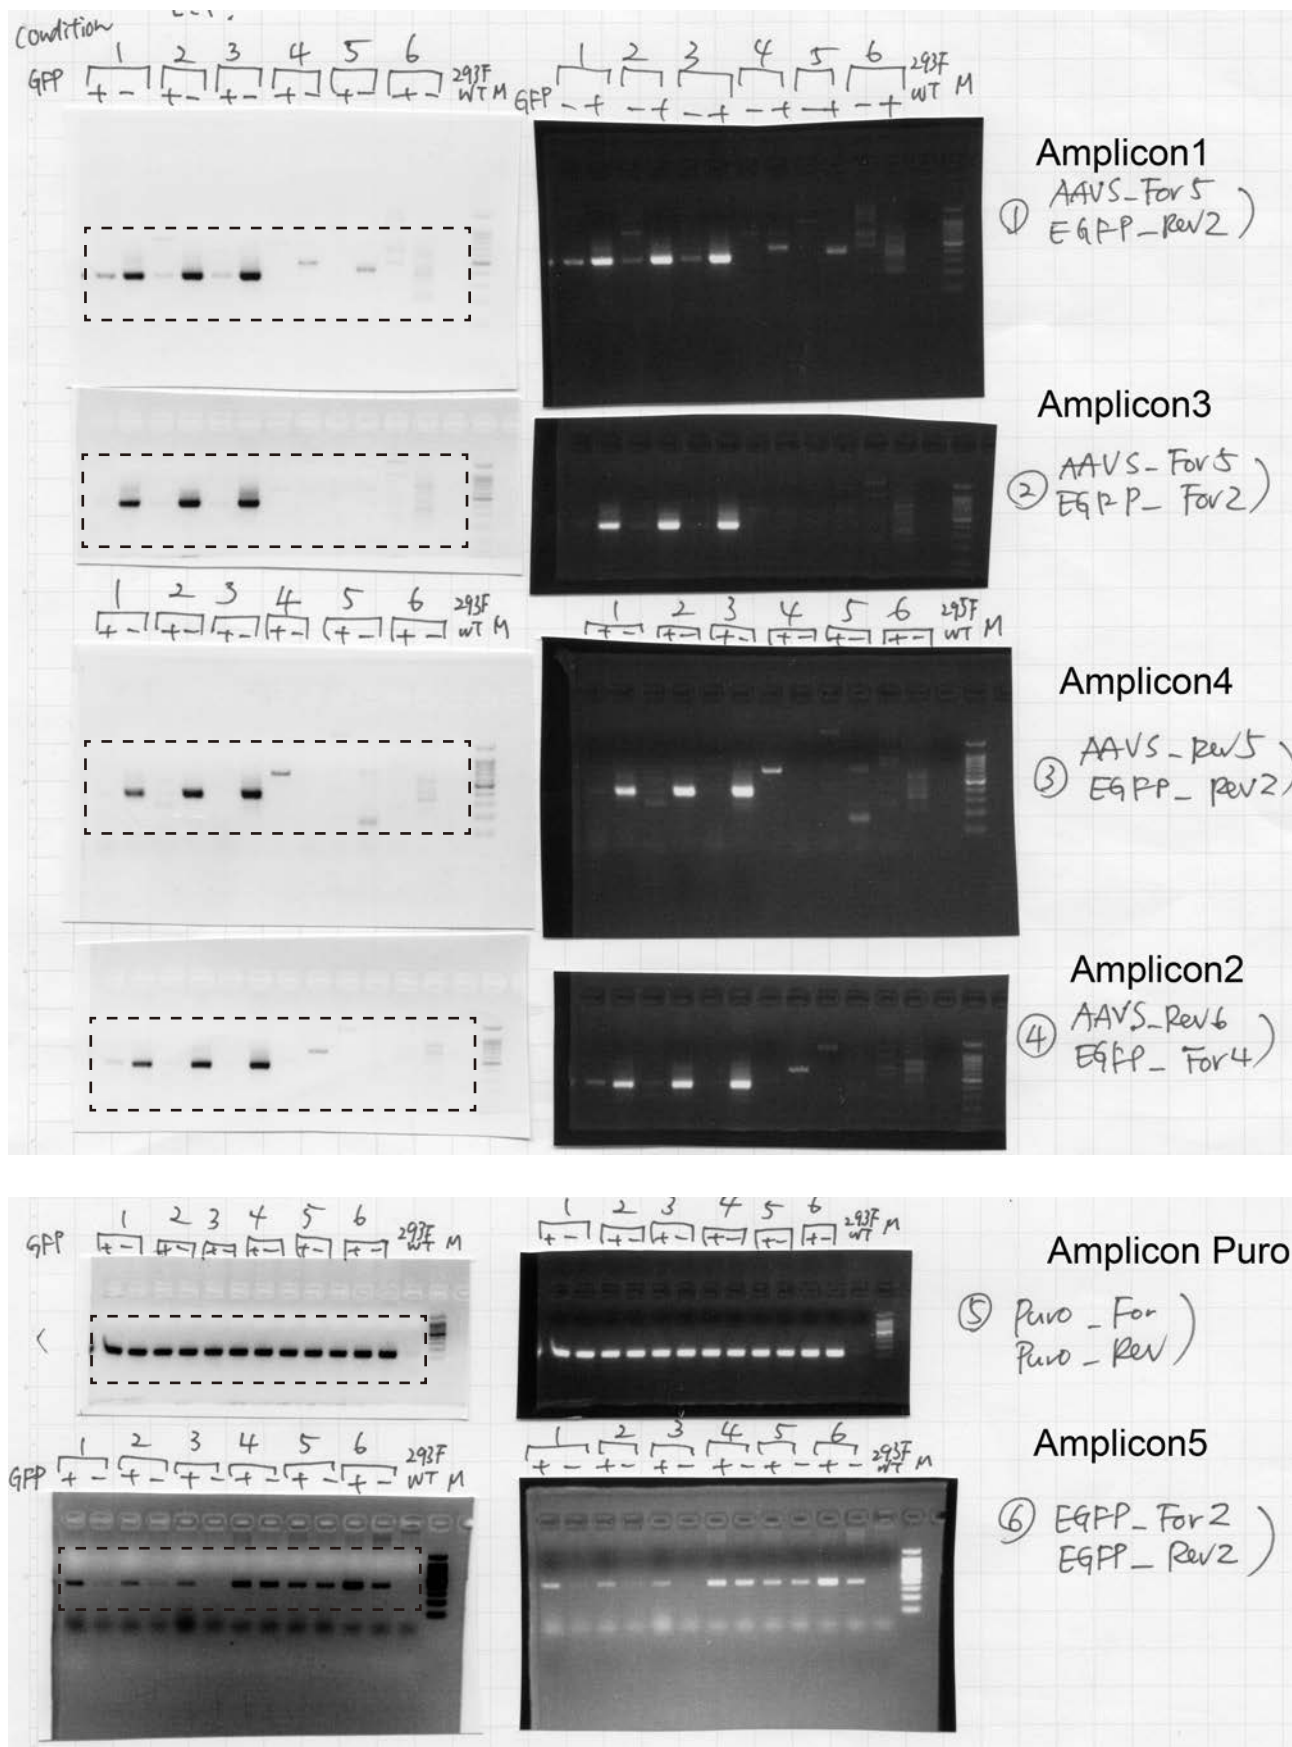

# Supplemental information

## Figure 3a

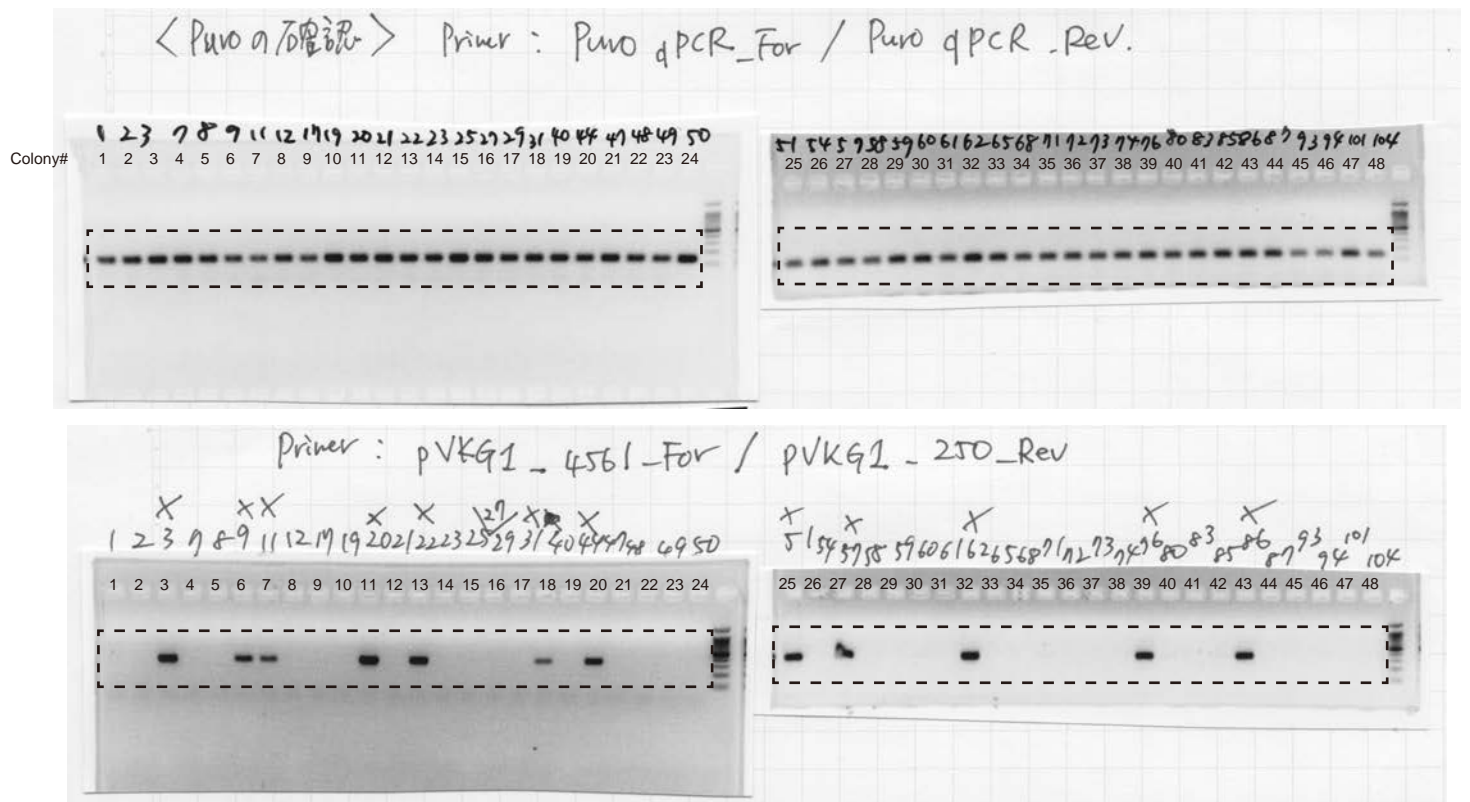

Supplimental information

Figure 3b

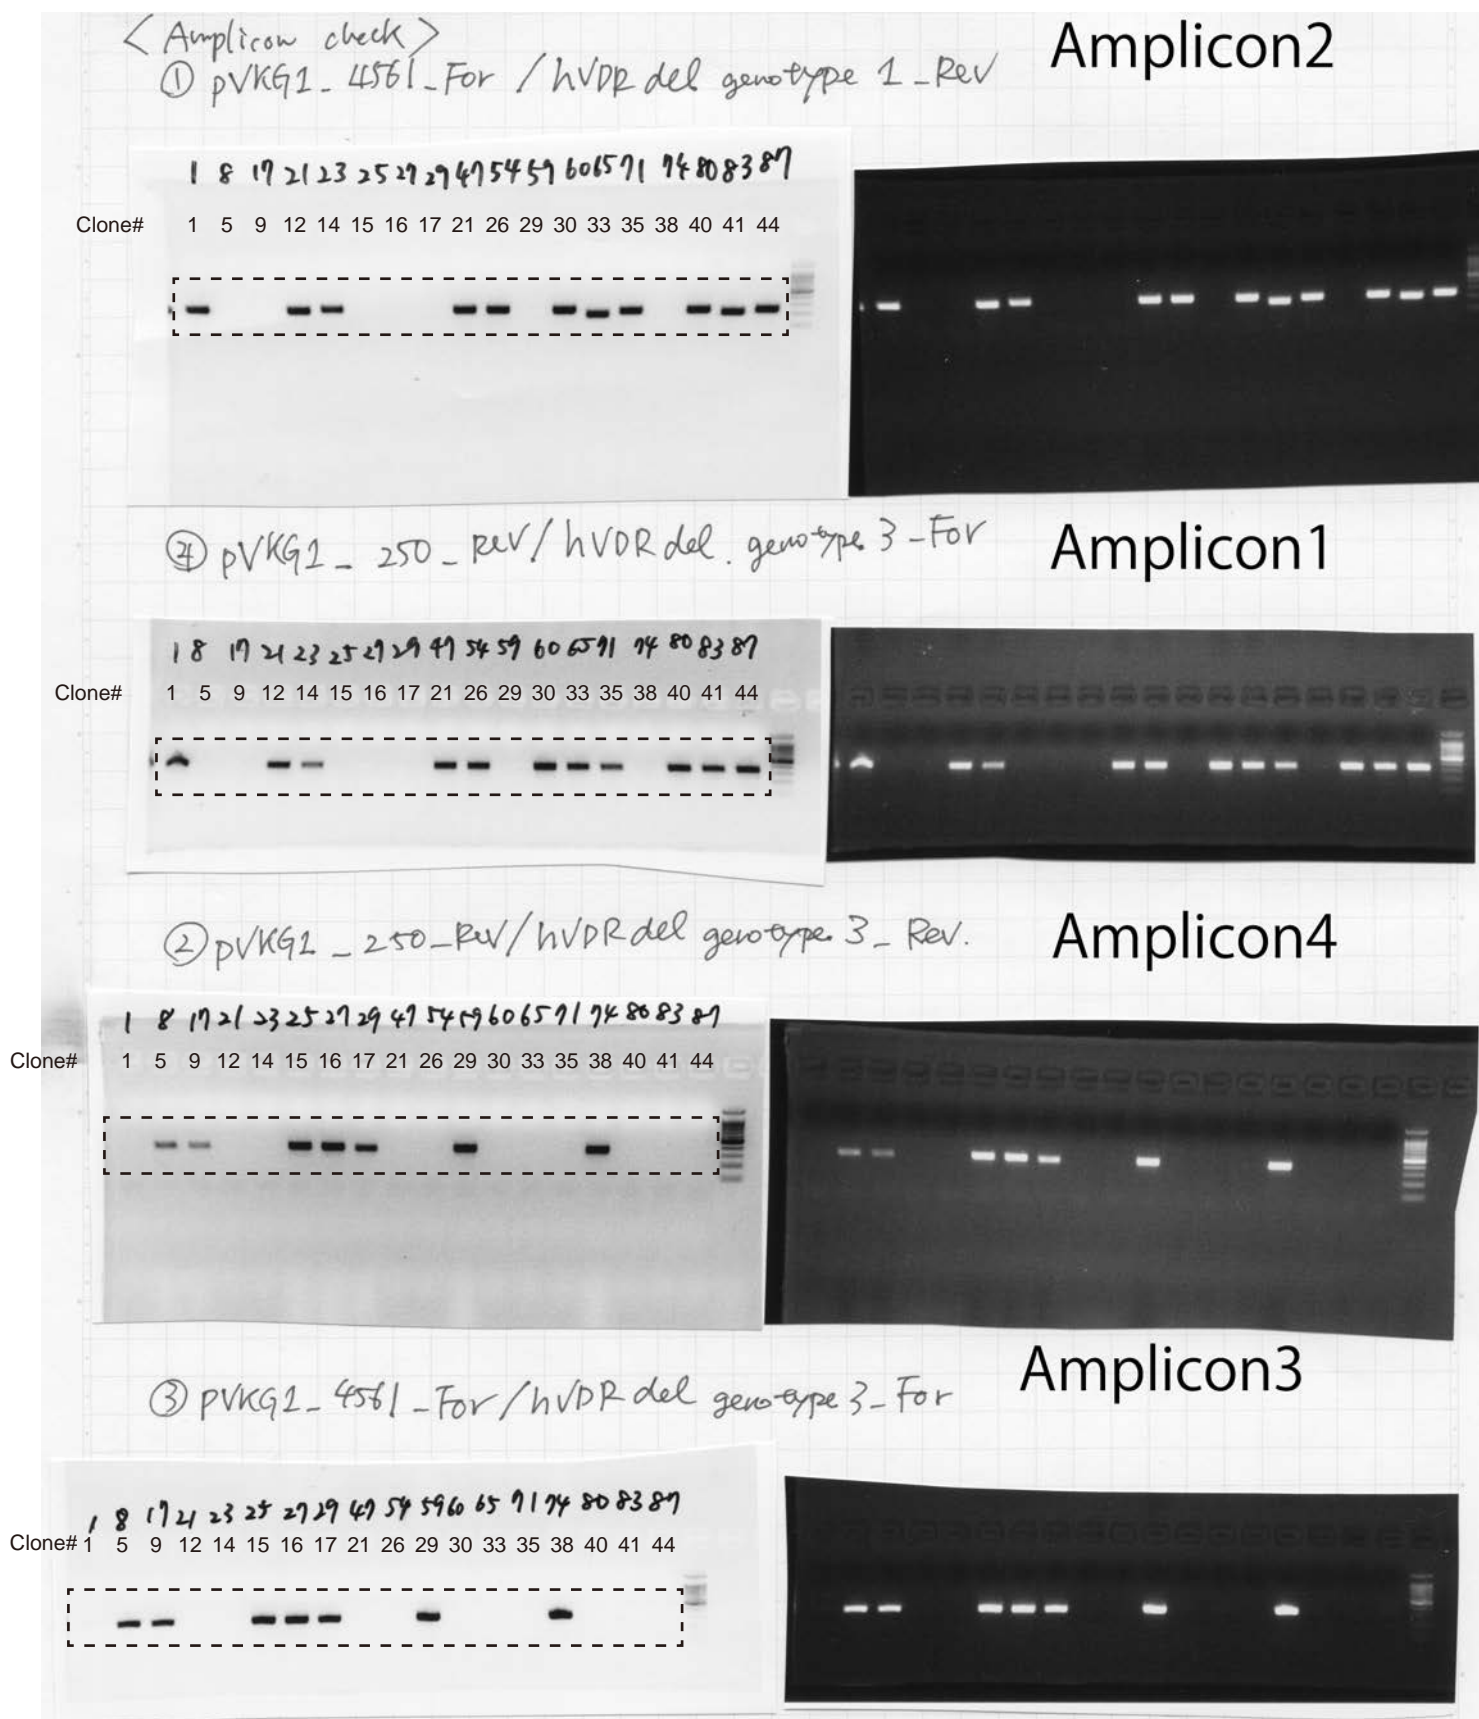



# Supplemental information

## Figure 4a

### $\alpha$ VDR

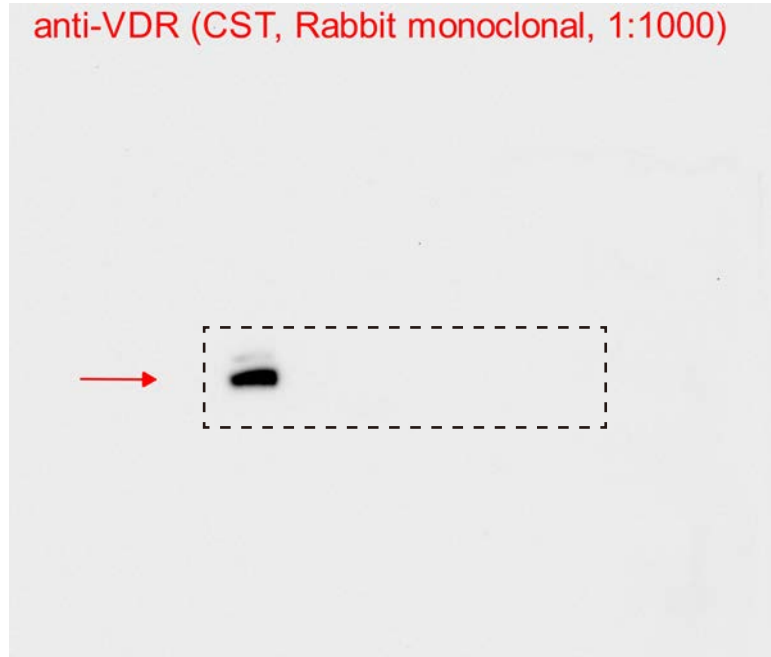

### $\alpha$ VDR / Ladder marker

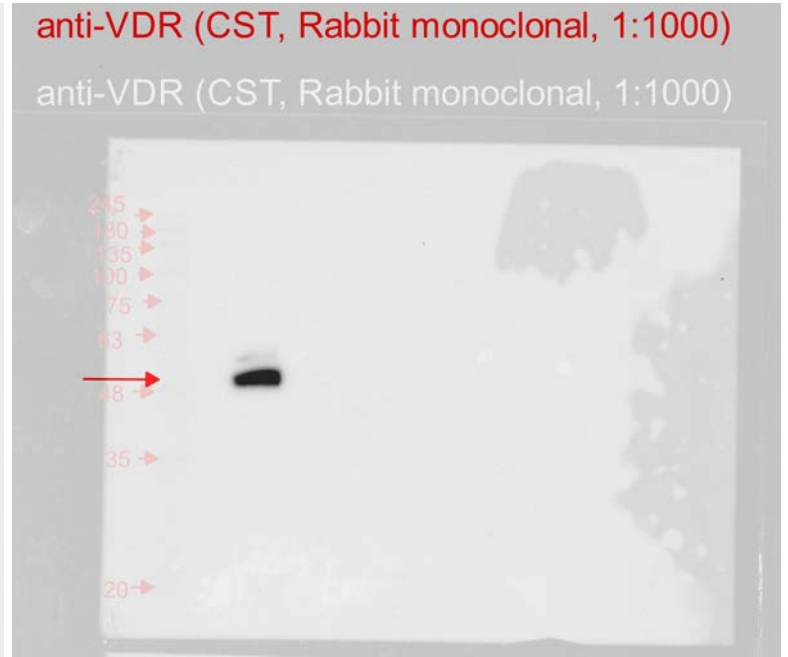

### $\alpha$ Hsp90

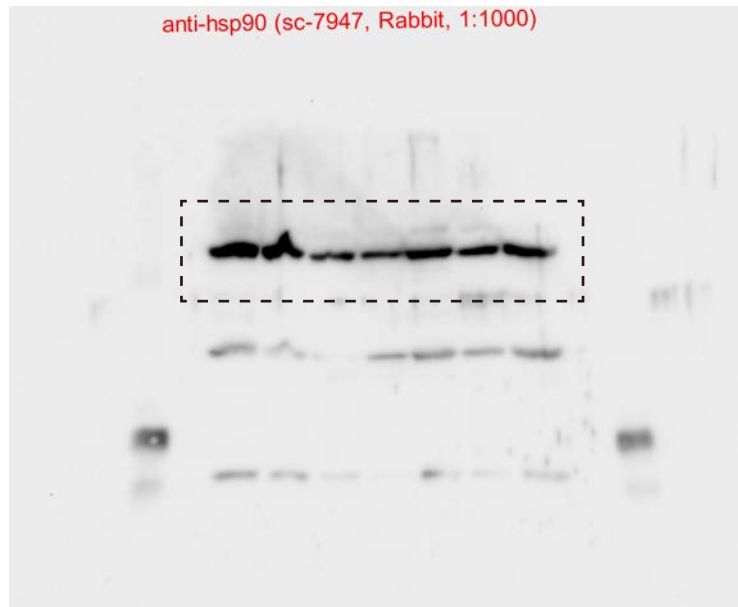

### $\alpha$ Hsp90 / Ladder marker

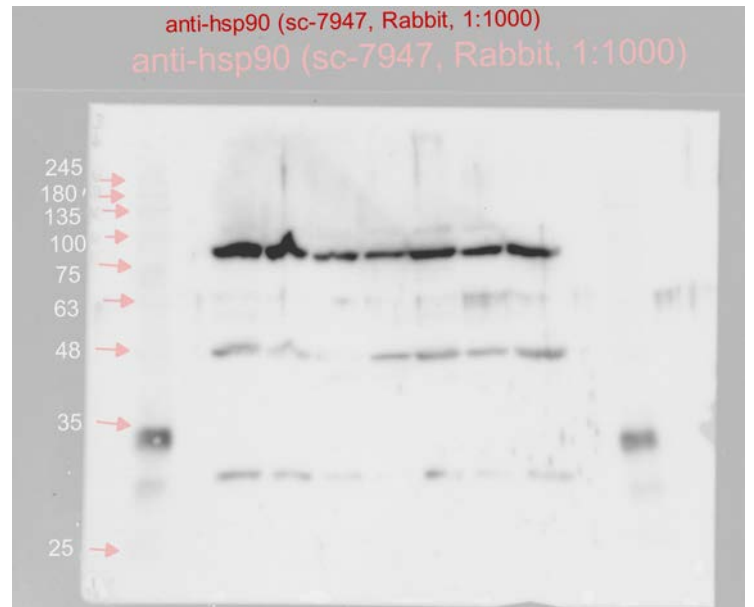

### $\alpha$ $\beta$ -ACT

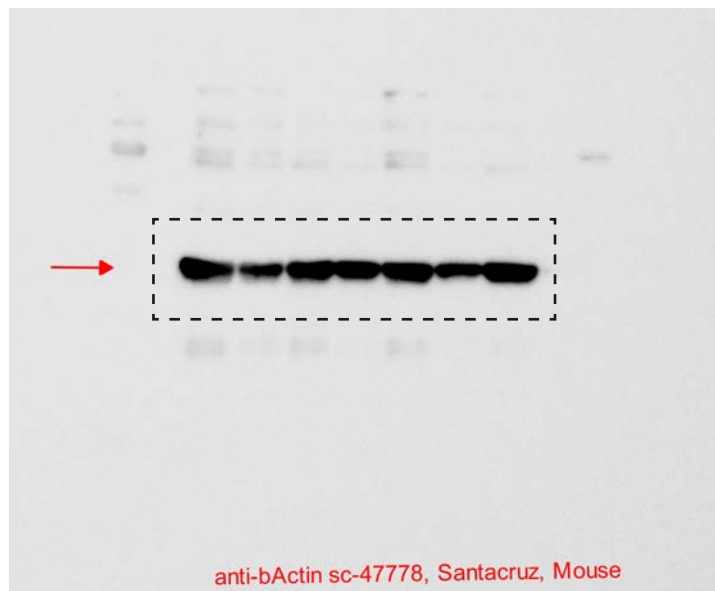

### $\alpha$ $\beta$ -ACT / Ladder marker

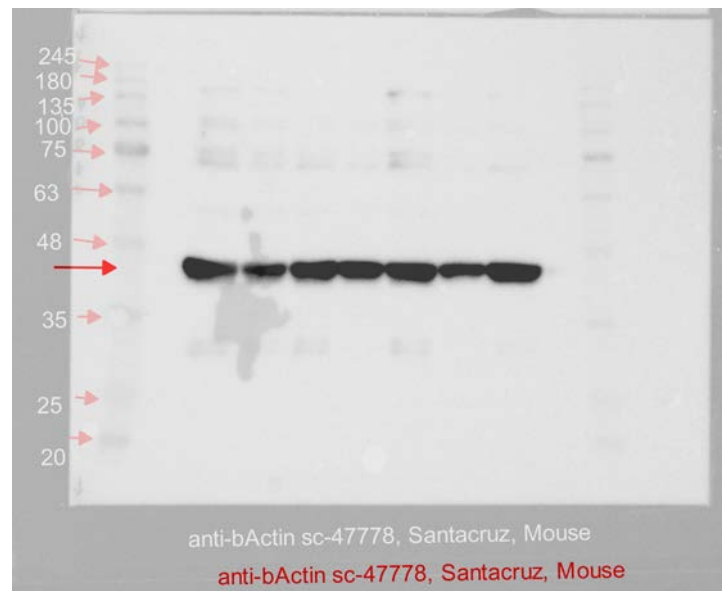

Supplemental information

Supplementary Figure S4a

Amplicon 1

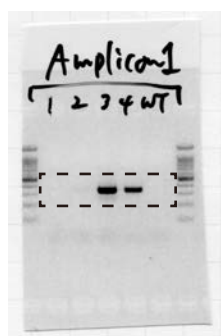

Amplicon 2

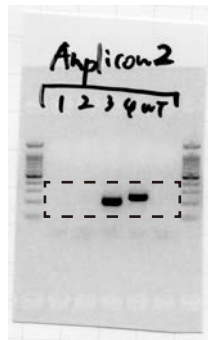

Amplicon 3

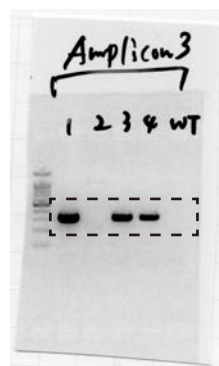

Amplicon 4

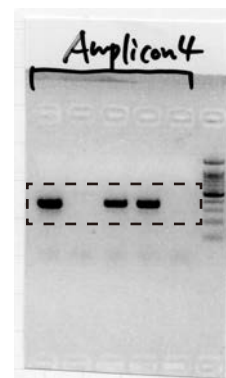

M : 100bp ladder marker

Amplicon Puro

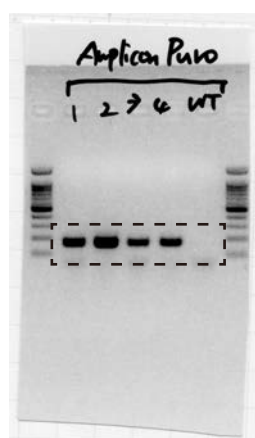

Amplicon BSD

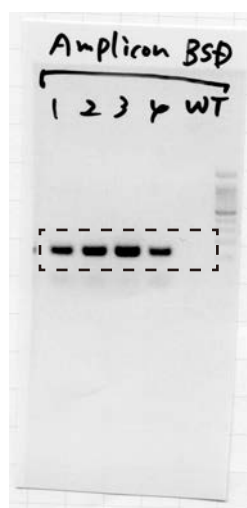

Amplicon 6

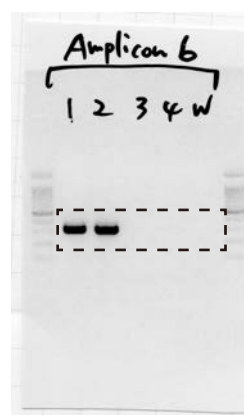

Supplemental information

Supplementary Figure S4c

$\alpha$ VDR

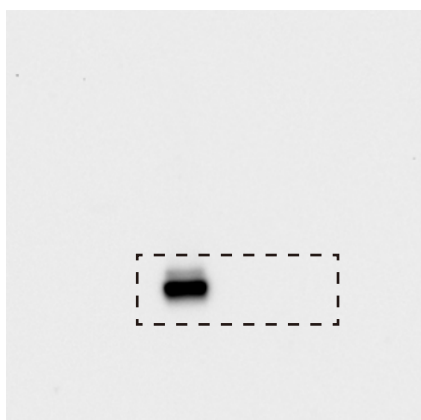

$\alpha$ VDR / Ladder marker

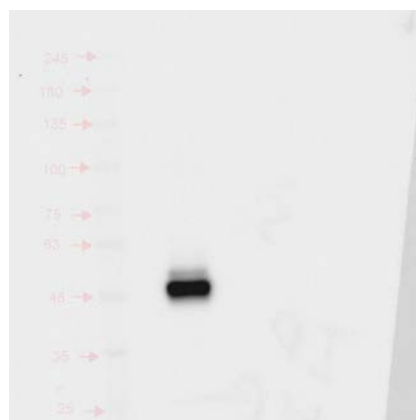

$\alpha$ Hsp90

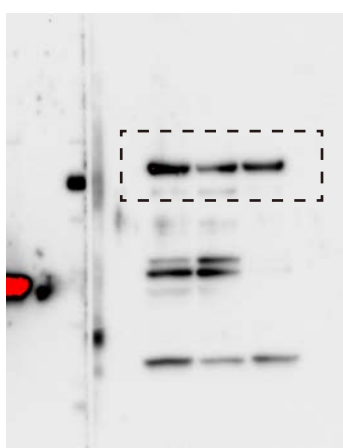

$\alpha$ Hsp90 / Ladder marker

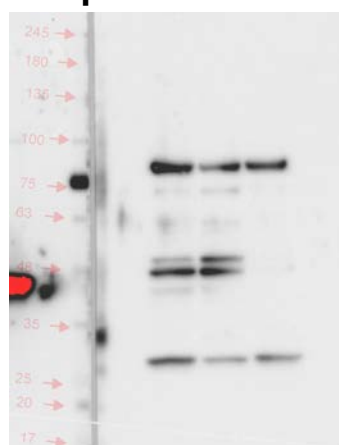

$\alpha\beta$ -ACT

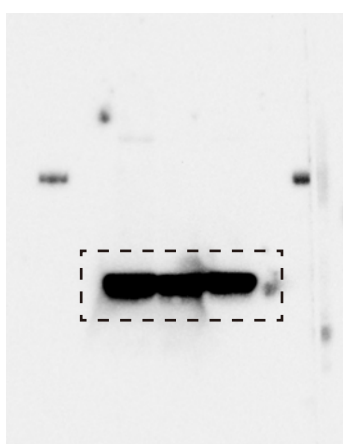

$\alpha\beta$ -ACT / Ladder marker

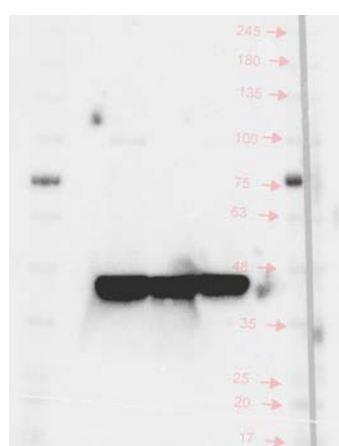

Supplemental information

Supplementary Figure S5a

Amplicon 1

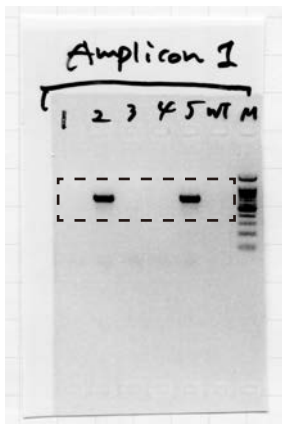

Amplicon 2

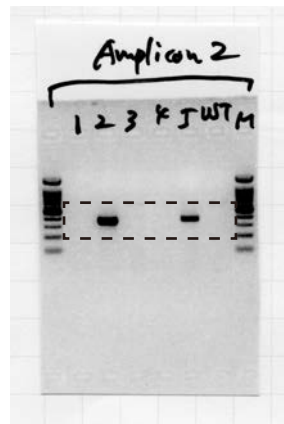

Amplicon 3

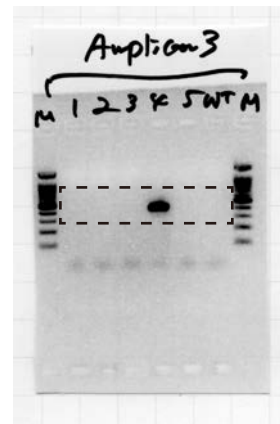

Amplicon 4

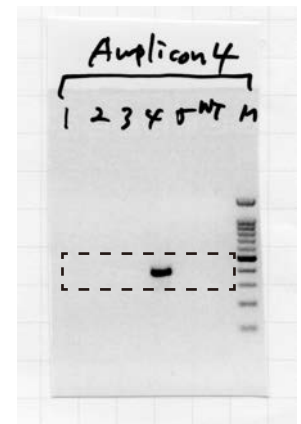

M : 100bp ladder marker

Amplicon 5

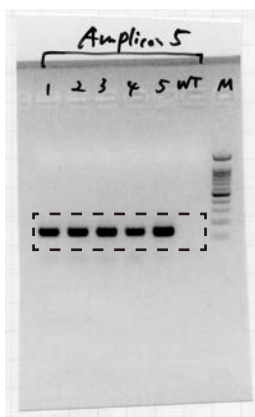

Amplicon 6

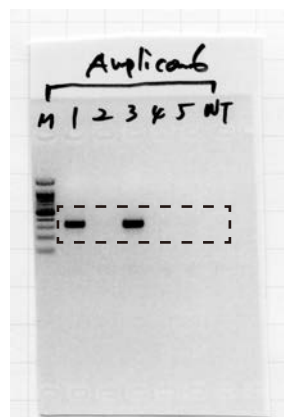

# Supplemental information

## Supplementary Figure S5e

$\alpha$ HR

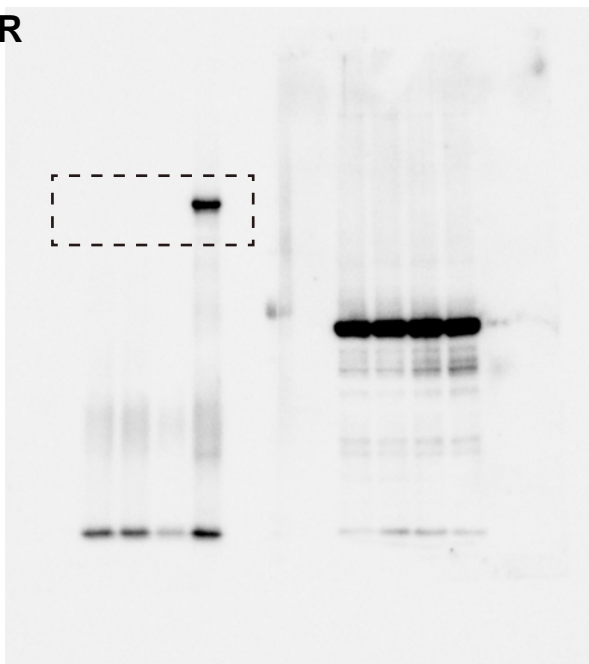

$\alpha$ HR / Ladder marker

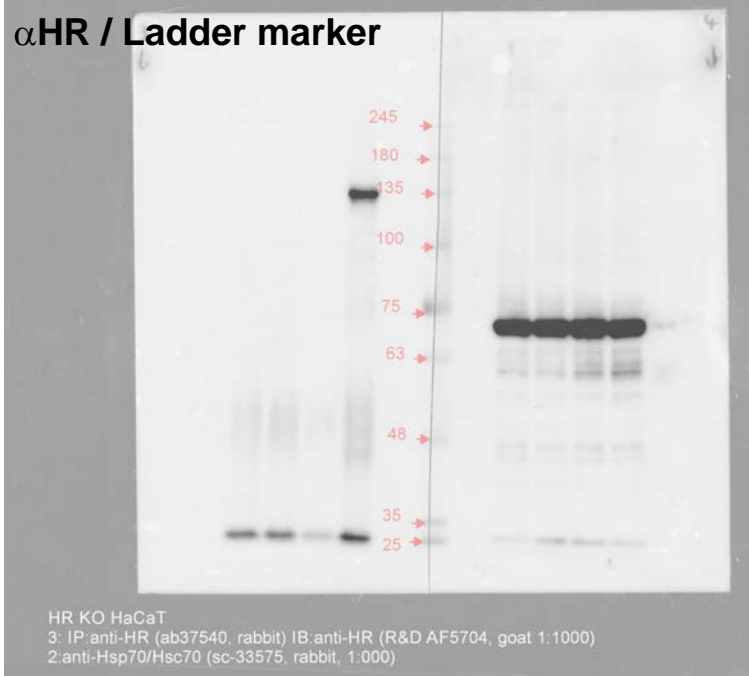

$\alpha$ Hsp90

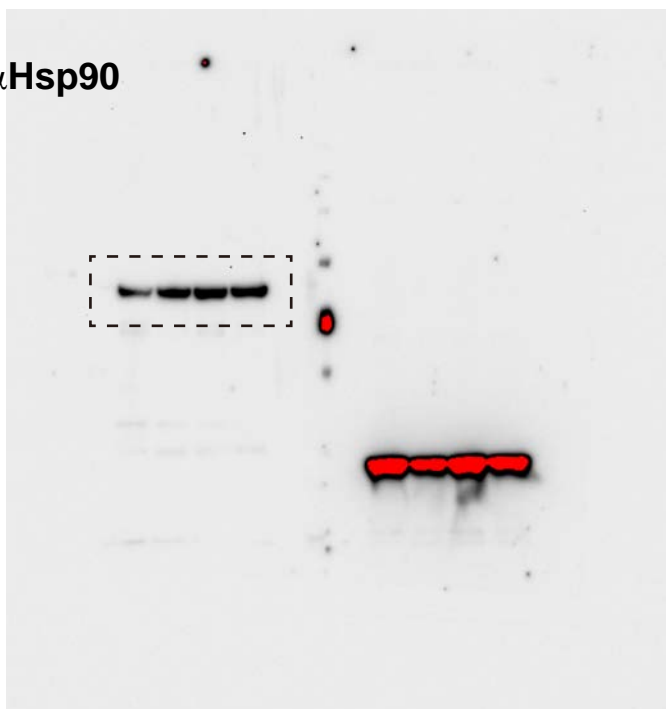

$\alpha$ Hsp90 / Ladder marker

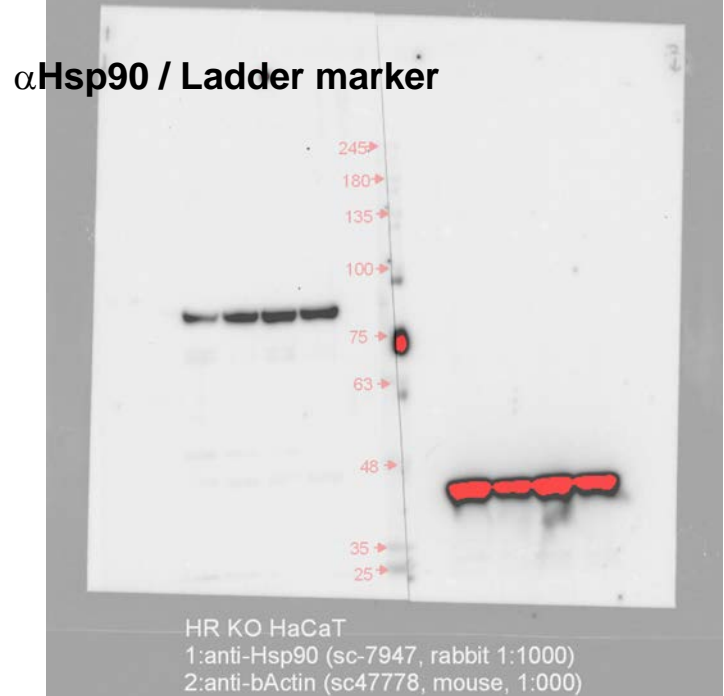

$\alpha\beta$ -ACT

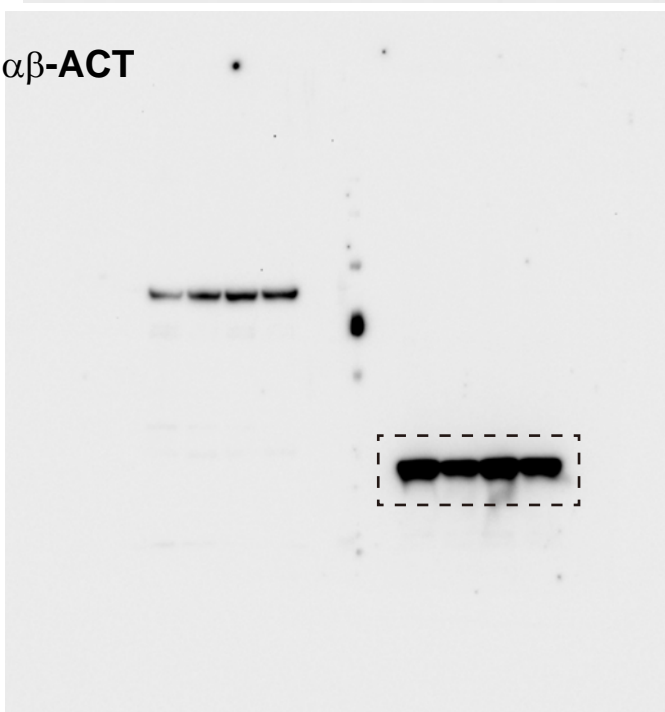

$\alpha\beta$ -ACT / Ladder marker

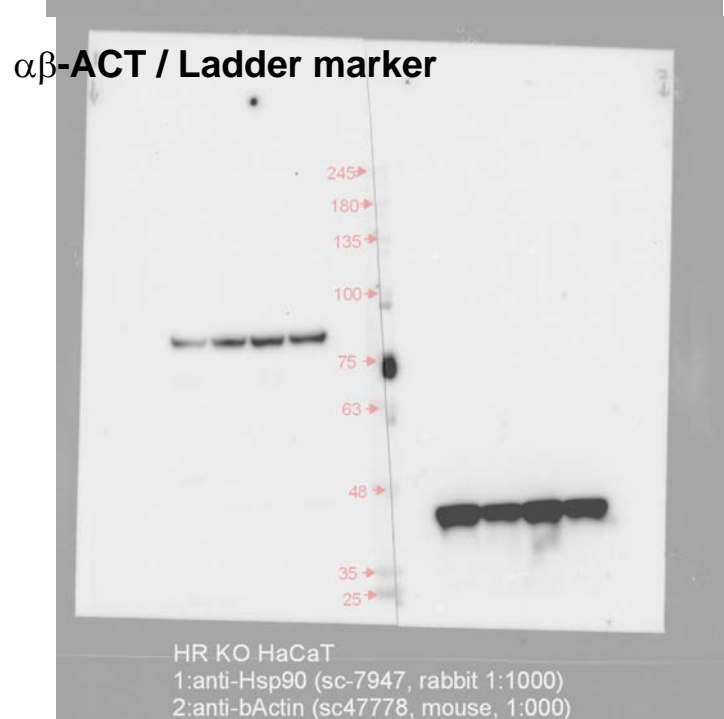

Supplement: 41598_2017_18911_MOESM1_ESM.pdf [file 41598_2017_18911_MOESM1_ESM.pdf]
